# Supplementary material
Source: PubMed Central journal article supplement (PMC10114790)
Supplement: vg1c00005_si_001.pdf [file vg1c00005_si_001.pdf]

## Impacts of COVID-19 outbreak on the municipal solid waste (MSW) management: Now and beyond the pandemic

Poritosh Roy<sup>1,2</sup>, Amar K. Mohanty<sup>1,2\*</sup>, Alexis Wagner<sup>3</sup>, Shayan Sharif<sup>4</sup>, Hamdy Khalil<sup>5</sup>, and Manjusri Misra<sup>1,2\*</sup>

<sup>1</sup>School of Engineering, Thornbrough Building, University of Guelph, 50 Stone Road East, Guelph, Ontario N1G 2W1,

Canada.

<sup>2</sup>Bioproducts Discovery and Development Centre, Department of Plant Agriculture, Crop Science Building, University of Guelph, 50 Stone Road East, Guelph, Ontario N1G 2W1, Canada.

<sup>3</sup>Innovation, Science and Economic Development Canada, 235 Queen St, Ottawa, ON, K1A 0H5, Canada

<sup>4</sup>Ontario Veterinary College, University of Guelph, 50 Stone Road E., Guelph, ON, N1G 2W1 Canada,

<sup>5</sup>Woodbridge Foam Corporation, 4240 Sherwoodtowne Boulevard, Mississauga, ON, L4Z 2G6, Canada

\*Corresponding author: mmisra@uoguelph.ca (M. Misra); mohanty@uoguelph.ca (A. Mohanty)

Table SI-1 Emission limits of incineration processes in different countries/regions.

| Country/ region | Waste type        | Emission factors, mg/Nm <sup>3</sup> |                 |        |                 |        |        | Reference |
|-----------------|-------------------|--------------------------------------|-----------------|--------|-----------------|--------|--------|-----------|
|                 |                   | CO                                   | SO <sub>2</sub> | HCl    | NO <sub>x</sub> | PM     | HF     |           |
| China           | MSW               | 80                                   | 80              | 50     | 250             | 20     | -      | (80,82)   |
| China           | *SMW              | 63                                   | 9.3             | 8.7    | 91              | 32     | 0.72   | (80)      |
| China           | *MSW              | -                                    | 314             | 279    | 341             | -      | -      | (81)      |
| Japan           | MSW               | 38.2                                 | -               | 77.7   | 522.6           | 44     | -      | (81)      |
| Japan           | *MSW              | -                                    | 564             | 618    | 259             | -      | -      | (81)      |
| South Korea     | MSW               | 57.3                                 | 78.5            | 29.9   | 131.7           | 20     | -      | (81)      |
| South Korea     | *MSW              | -                                    | 65              | 263    | 604             | -      | -      | (81)      |
| US              | MSW               | 89                                   | 60              | 32.5   | 270             | 10     | -      | (80)      |
| US              | *MSW              | -                                    | 226             | -      | 867             | -      | -      | (80)      |
| EU              | MSW               | 50                                   | 50              | 10     | 200             | 10     | -      | (81)      |
| France          | *MSW <sup>^</sup> | 43.9                                 | 54.0            | 23.6   | 763             | 6.24   | -      | (89)      |
| Vietnam         | *SMW              | 0.065                                | 0.536           | 0.0014 | -               | 0.0125 | 0.0006 | (83)      |
| Vietnam         | SMW               | 250                                  | 250             | 50     | -               | 100    | -      | (83)      |

PM: particulate matter; EU: European Union; US: United States; MSW: municipal solid waste; SMW: solid medical waste; HF: hydrogen fluoride; \*measured data; <sup>^</sup>g/t MSW;

Table SI-2 Composition of waste streams.

| Waste stream | Composition, % |         |               |       |       |         |      |            |                   |        | Reference |
|--------------|----------------|---------|---------------|-------|-------|---------|------|------------|-------------------|--------|-----------|
|              | Organic        | Plastic | Paper & board | Glass | Metal | Textile | Wood | Electronic | Building material | Others |           |
| MSW          | 64.1           | 14.1    | 7.6           | 2.8   | 1.2   | 2.2     | -    | -          | -                 | 8.0    | (90)      |
| MSW (LIC)    | 64.0           | 8.0     | 5.0           | 3.0   | 3.0   | -       | -    | -          | -                 | 17.0   | (82)      |
| MSW (HIC)    | 28.0           | 11.0    | 31.0          | 7.0   | 6.0   | -       | -    | -          | -                 | 17.0   | (82)      |
| MSW          | 36.6           | 10.6    | 15.0          | 2.2   | 3.8   | -       | 3.8  | 2.2        | 9.4               | 16.5   | (69)      |
| MSW          | 46.5           | 20.0    | 17.0          | 4.0   | 3.0   | -       | 3.0  | -          | -                 | 6.0    | (91)      |

|     |      |      |      |     |     |     |     |   |   |     |      |
|-----|------|------|------|-----|-----|-----|-----|---|---|-----|------|
| MSW | 52.7 | 16.8 | 19.3 | 3.2 | 1.7 | -   | -   | - | - | 6.3 | (74) |
| MSW | 51.0 | 9.7  | 12.5 | 1.7 | 2.1 | 4.9 | 2.5 | - | - | 5.0 | (92) |

---

MSW: municipal solid waste; MW: medical waste; LIC: low income countries; HIC: high income countries
